# Supplementary material for: Quantifying the causal impact of funding bedside antigen testing on the incidence of respiratory syncytial virus infection in Japan: a difference-in-differences study
Source: PubMed Central journal article supplement — Ann Transl Med. 2020 Nov;8(21):1441. doi: 10.21037/atm-20-423 (PMC7723552; doi:10.21037/atm-20-423), 2020-11
Supplement: atm-08-21-1441-supplementary.pdf [file atm-08-21-1441-supplementary.pdf]

### Expected value of the incidence for the analysis of age-specific data to test the validity of the assumption of linear trend

We set  $\widehat{Y}_{at}$  as representing the outcome, i.e., the incidence of influenza or RSV in age group  $a$  in year  $t$ . If the baseline trend varies with time during the pre-intervention period (i.e.,  $T_t = 0$ ) by age group, the resulting expected incidence is

$$\widehat{Y}_{at} = \widehat{\alpha}_{a,0} + \widehat{\alpha}_{a,1}(t - t_0) + \widehat{\gamma}_a RSV_g + \widehat{\alpha}_{a,2}(t - t_0) RSV_g \quad [4]$$

where  $RSV_g$  and  $T_t$  are the same dummy variables as defined for Eq. [1] in the main text.  $\widehat{\alpha}_{a,0}$  and  $\widehat{\alpha}_{a,1}$  describe the age-specific baseline incidence of both influenza and RSV infection that are assumed to be in parallel over time, and  $t_0$  is the first year of our analysis (i.e.,  $t_0 = 2008/09$ ).  $\widehat{\alpha}_{a,2}$  measures the difference in the linear trend of RSV incidence compared with that of influenza during the pre-intervention period.  $\widehat{\gamma}_a$  is the difference in baseline incidence for RSV infection compared to influenza.

### Expected value of the incidence for the analysis of age-specific data

We set  $\widehat{\gamma}_a$  as representing the incidence of age group  $a$  in year  $t$ . The expected incidence by age group was calculated as

$$\widehat{Y}_{at} = \widehat{\alpha}_a + \widehat{\beta}_a (RSV_g T_t) + \widehat{\gamma}_a RSV_g + \widehat{\delta}_a T_t \quad [5]$$

Since Eq. [5] independently estimates the incidences of RSV and influenza infection for every single age group, the parameters  $\widehat{\alpha}_a$ ,  $\widehat{\beta}_a$ ,  $\widehat{\gamma}_a$ , and  $\widehat{\delta}_a$  were independently handled by age-group  $a$  in Eq. [5] where  $a = 0-4, 5-9, 10-14, 15-19, \text{ or } \geq 20$ . Both diseases are commonly seen among children, and it was not plausible that the causal impact among adults is dependent on that of children.

### Models to select the best model

We considered not only Eq. [1] and Eq. [5], both of which account for a constant baseline (without time trend) and causal effect, but also possible combinations of time-dependence in the baseline trend and causal effect as follows.

Assuming that both the baseline trend and causal effect vary with time, the expected value of the incidence in prefecture  $g$  and year  $t$  is calculated as

$$\widehat{Y}_{gt} = \widehat{\alpha}_0 + \widehat{\alpha}_1(t - t_0) + \widehat{\beta}(t - t_v)(RSV_g T_t) + \widehat{\gamma} RSV_g + \widehat{\delta} T_t \quad [6]$$

where  $\widehat{\alpha}_0$  and  $\widehat{\alpha}_1$  describe the incidence of both influenza and RSV infection that are assumed to be parallel over time during the pre-intervention period,  $t_0$  is the first year of our analysis (i.e.,  $t_0 = 2008/09$ ), and  $t_v$  is the first year in which the insurance coverage for bedside RSV antigen testing was introduced (i.e.,  $t_v = 2012/13$ ). If only the baseline trend varies with time, the expected incidence value is

$$\widehat{Y}_{gt} = \widehat{\alpha}_0 + \widehat{\alpha}_1(t - t_0) + \widehat{\beta}(RSV_g T_t) + \widehat{\gamma} RSV_g + \widehat{\delta} T_t \quad [7]$$

If only the causal effect varies with time, we have

$$\widehat{Y}_{gt} = \widehat{\alpha} + \widehat{\beta}(t - t_v)(RSV_g T_t) + \widehat{\gamma} RSV_g + \widehat{\delta} T_t \quad [8]$$

Using similarly structured models, age-specific incidence data were also explored.

**Table S1** Comparison of four DID models based on the AIC

| Data       | Models                                     | Number of parameters | AIC value |
|------------|--------------------------------------------|----------------------|-----------|
| Age        | Time-dependent $\alpha$ , $\beta$          | 25                   | 563       |
| Age        | Constant $\alpha$ , $\beta$                | 20                   | 552       |
| Age        | Constant $\alpha$ , time-dependent $\beta$ | 25                   | 558       |
| Age        | Time-dependent $\alpha$ , constant $\beta$ | 20                   | 544       |
| Prefecture | Time-dependent $\alpha$ , $\beta$          | 5                    | 4,164     |
| Prefecture | Constant $\alpha$ , $\beta$                | 4                    | 4,161     |
| Prefecture | Constant $\alpha$ , time-dependent $\beta$ | 4                    | 4,164     |
| Prefecture | Time-dependent $\alpha$ , constant $\beta$ | 5                    | 4,159     |

The results of AIC comparison for four different models are shown. Each AIC value was estimated by  $AIC = 2 \log \left( \frac{SSE}{n} \right) + 2k$  [9], where SSE is the sum of the squared error and  $n$  and  $k$  represent the number of sample data points and the number of parameters, respectively. DID, difference-in-differences; AIC, Akaike information criterion.

**Table S2** Summary of the estimates from four DID models analyzing age- and prefecture-specific data

| Model                                         | Parameters | Age                        |                            |                              |                            |                          |                      |
|-----------------------------------------------|------------|----------------------------|----------------------------|------------------------------|----------------------------|--------------------------|----------------------|
|                                               |            | Overall                    | 0–4                        | 5–9                          | 10–14                      | 15–19                    | ≥20                  |
| Time-dependent $\alpha$ ,<br>constant $\beta$ | $\alpha_0$ | 1,372<br>[1,326, 1,418]    | 5,499<br>[4,604, 6,394]    | 9,683 [8,788, 10,578]        | 5,318 [4,423, 6,213]       | 1,367 [472, 2,262]       | 265 [–629, 1,160]    |
|                                               | $\alpha_1$ | 24 [9, 38]                 | 224 [–62, 511]             | 243 [–43, 530]               | 89 [–197, 376]             | 10 [–277, 296]           | 10 [–276, 297]       |
|                                               | $\beta$    | 162 [85, 239]              | 1,255 [–234, 2,744]        | 1,912 [423, 3,401]           | 995 [–494, 2,484]          | 281 [–1,208, 1,769]      | –112 [–1,601, 1,377] |
|                                               | $\gamma$   | –1,347<br>[–1,404, 1,290]  | –4,714<br>[–5,824, –3,605] | –10,023<br>[–11,133, –8,914] | –5,450<br>[–6,559, –4,340] | –1,382<br>[–2,491, –272] | –280 [–1,390, 829]   |
|                                               | $\delta$   | –230 [–316, –144]          | –1,432 [–3,097, 232]       | –2,995 [–4,659, –1,330]      | –1,395 [–3,059, 270]       | –325 [–1,990, 1,339]     | 67 [–1,598, 1,731]   |
| Constant $\alpha$ ,<br>time-dependent $\beta$ | $\alpha$   | 1,386 [1,348, 1,424]       | 5,700 [4,944, 6,456]       | 9,782 [9,026, 10,538]        | 5,313 [4,557, 6,069]       | 1,343 [587, 2,099]       | 296 [–460, 1,052]    |
|                                               | $\beta$    | 29 [10, 47]                | 256 [–108, 621]            | 319 [–45, 683]               | 166 [–198, 530]            | 47 [–318, 411]           | –19 [–383, 346]      |
|                                               | $\gamma$   | –1,305<br>[–1,354, –1,255] | –4,444<br>[–5,423, –3,465] | –9,493<br>[–10,472, –8,514]  | –5,174<br>[–6,153, –4,194] | –1,304<br>[–2,283, –325] | –312 [–1,291, 668]   |
|                                               | $\delta$   | –86 [–133, –38]            | –180 [–1,127, 766]         | –1,423 [–2,369, –476]        | –746 [–1,692, 201]         | –210 [–1,157, 736]       | 84 [–862, 1,031]     |
|                                               | $\alpha_0$ | 1,354 [1,305, 1,403]       | 5,381 [4,378, 6,384]       | 9,468 [8,464, 10,471]        | 5,236 [4,232, 6,239]       | 1,356 [353, 2,359]       | 259 [–745, 1,262]    |
| Time-dependent $\alpha$ ,<br>$\beta$          | $\alpha_1$ | 17 [1, 33]                 | 167 [–167, 500]            | 164 [–169, 498]              | 40 [–293, 374]             | –7 [–340, 327]           | 20 [–314, 353]       |
|                                               | $\beta$    | 20 [0, 40]                 | 173 [–235, 581]            | 237 [–172, 645]              | 146 [–263, 554]            | 50 [–358, 459]           | –29 [–437, 380]      |
|                                               | $\gamma$   | –1,291<br>[–1,342, –1,239] | –4,306<br>[–5,345, –3,266] | –9,356<br>[–10,396, –8,316]  | –5,140<br>[–6,180, –4,100] | –1,309<br>[–2,349, –270] | –295 [–1,335, 744]   |
|                                               | $\delta$   | –149 [–227, –72]           | –805 [–2,387, 777]         | –2,038 [–3,620, –457]        | –897 [–2,479, 684]         | –185 [–1,767, 1,397]     | 11 [–1,571, 1,592]   |
|                                               | $\alpha$   | 1,408 [1,367, 1,448]       | 5,835 [5,048, 6,623]       | 10,048 [9,260, 10,835]       | 5,452 [4,664, 6,239]       | 1,382 [595, 2,170]       | 281 [–507, 1,068]    |
| Constant $\alpha$ , $\beta$                   | $\beta$    | 162 [85, 240]              | 1,255 [–239, 2,749]        | 1,912 [418, 3,406]           | 995 [–499, 2,489]          | 281 [–1,214, 1,775]      | –112 [–1,606, 1,382] |
|                                               | $\gamma$   | –1,347<br>[–1,405, –1,289] | –4,714<br>[–5,828, –3,601] | –10,023<br>[–11,137, –8,910] | –5,450<br>[–6,563, –4,336] | –1,382<br>[–2,495, –268] | –280 [–1,394, 833]   |
|                                               | $\delta$   | –124 [–179, –69]           | –423 [–1,480, 633]         | –1,900 [–2,957, –844]        | –994 [–2,051, 62]          | –281 [–1,337, 776]       | 112 [–944, 1,169]    |

All parameters from four different DID models using age- and prefecture-specific data are shown. Upper and lower 95% CIs, derived from profile likelihood, are shown in parenthesis. DID, difference-in-differences; CI, confidence interval.
